# Supplementary material for: Novel Mn–Bi–S hybrid mesoporous nanosheets as an efficient electrocatalyst for nitrogen reduction reaction
Source: Royal Society of Chemistry journal article supplement (doi:10.1039/d4cy00124a), 2024-01-01
Supplement: d4cy00124a1.pdf [file d4cy00124a1.pdf]

## **Supplementary Information for**

# **Novel Mn-Bi-S hybrid mesoporous nanosheets as efficient electrocatalyst for nitrogen reduction reaction**

Yining Ban,<sup>a</sup> Zizai Ma,<sup>b,c,\*</sup> Zihao Wan,<sup>a</sup> Hefeng Yuan<sup>a,d</sup> and Xiaoguang Wang<sup>a,c,\*</sup>

<sup>a</sup> Laboratory of Advanced Materials and Energy Electrochemistry, Institute of New Carbon Materials, College of Material Science and Engineering, Taiyuan University of Technology, Taiyuan, 030024, China. E-mail: [wangxiaog1982@163.com](mailto:wangxiaog1982@163.com)

<sup>b</sup> College of Chemistry, Taiyuan University of Technology, Taiyuan, 030024, China. E-mail: [mazizai@tyut.edu.cn](mailto:mazizai@tyut.edu.cn)

<sup>c</sup> Shanxi Key Laboratory of Gas Energy Efficient and Clean Utilization, Taiyuan University of Technology, Taiyuan, 030024, China.

<sup>d</sup> Institute of Resources and Environmental Engineering, Shanxi University, Taiyuan 030006, China.

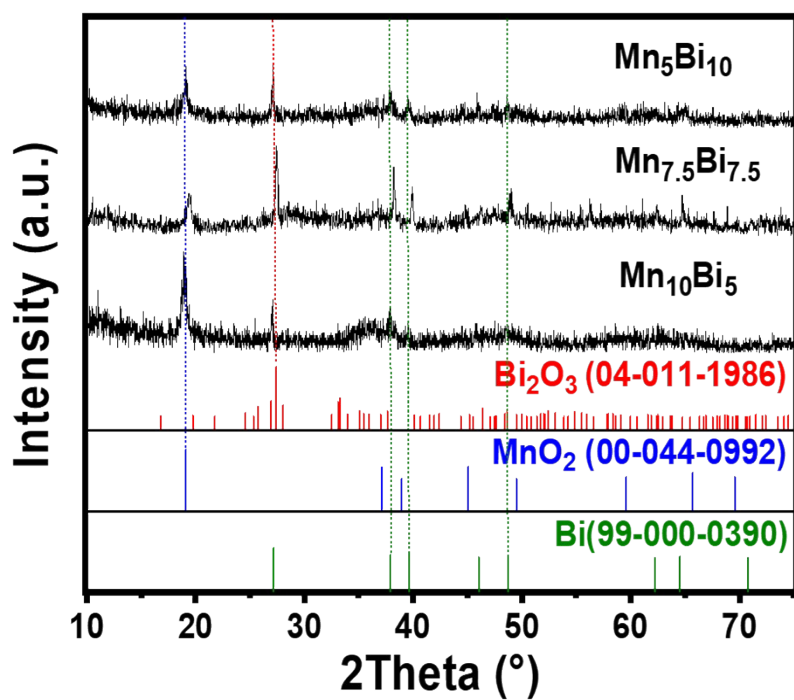

Fig. S1 XRD patterns of  $\text{Mn}_5\text{Bi}_{10}$ ,  $\text{Mn}_{7.5}\text{Bi}_{7.5}$  and  $\text{Mn}_{10}\text{Bi}_5$ .

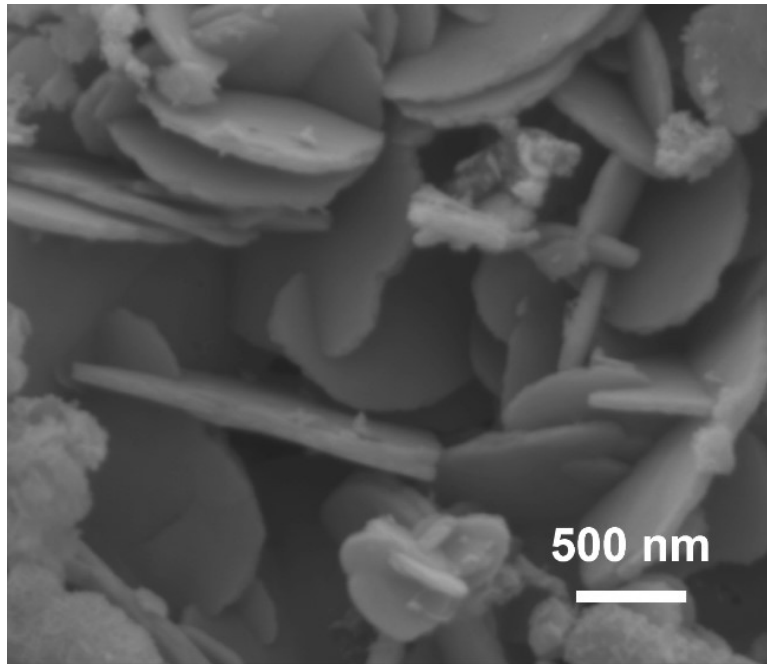

Fig. S2 SEM image of Mn<sub>7.5</sub>Bi<sub>7.5</sub>.

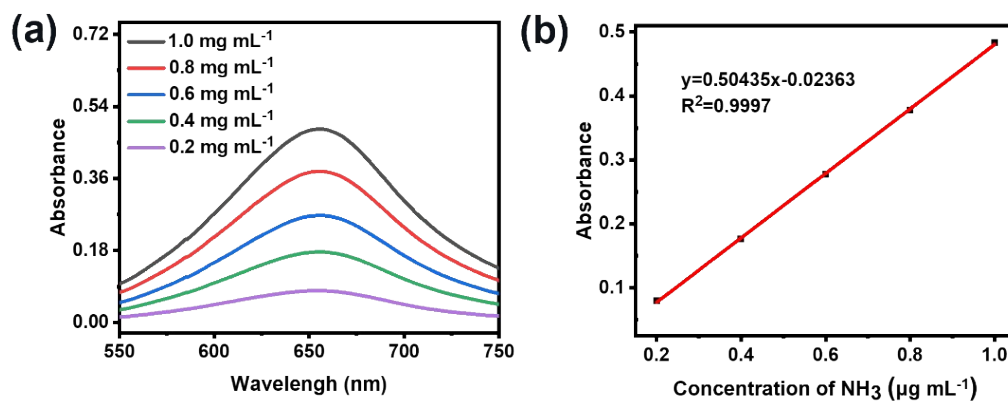

Fig. S3 (a) UV-vis spectra of indophenol assays with  $\text{NH}_4^+$  after incubated for 2 h at room temperature. (b) Calibration curve used for estimation of concentration of  $\text{NH}_4\text{Cl}$ .

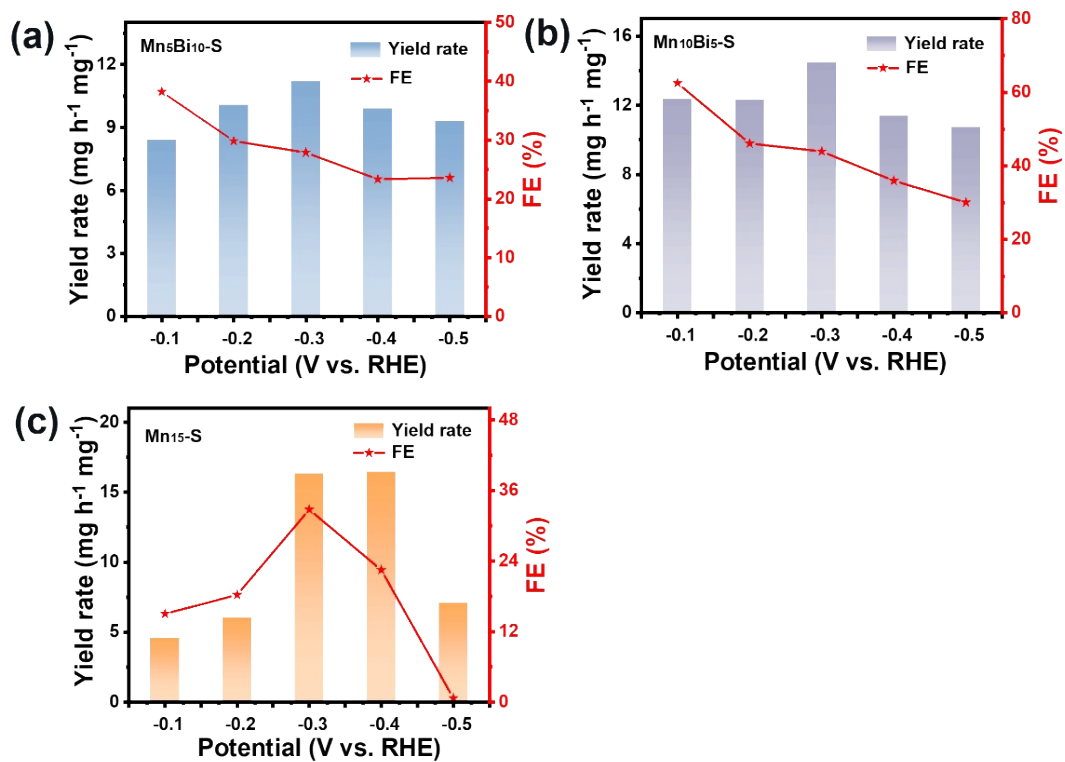

Fig. S4 Average ammonia production rate and FE at different potentials from -0.1 V to -0.5 V vs. RHE. (a)  $\text{Mn}_5\text{Bi}_{10}\text{-S}$ , (b)  $\text{Mn}_{10}\text{Bi}_5\text{-S}$  and (c)  $\text{Mn}_{15}\text{-S}$ .

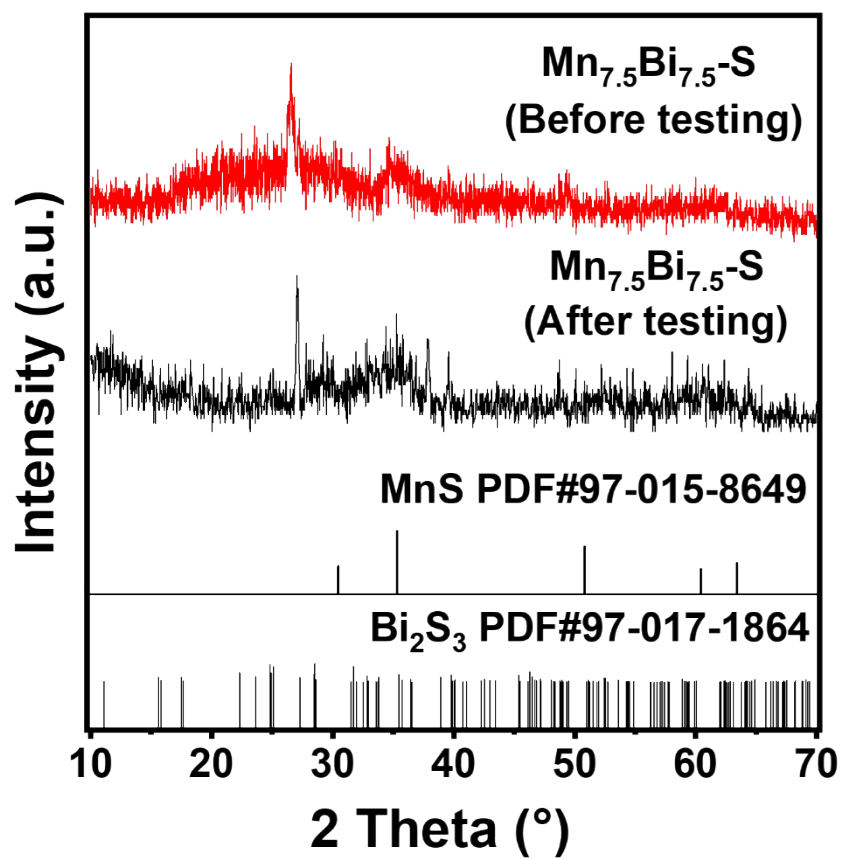

Fig. S5 XRD patterns of Mn<sub>7.5</sub>Bi<sub>7.5</sub>-S catalyst before and after stability test.

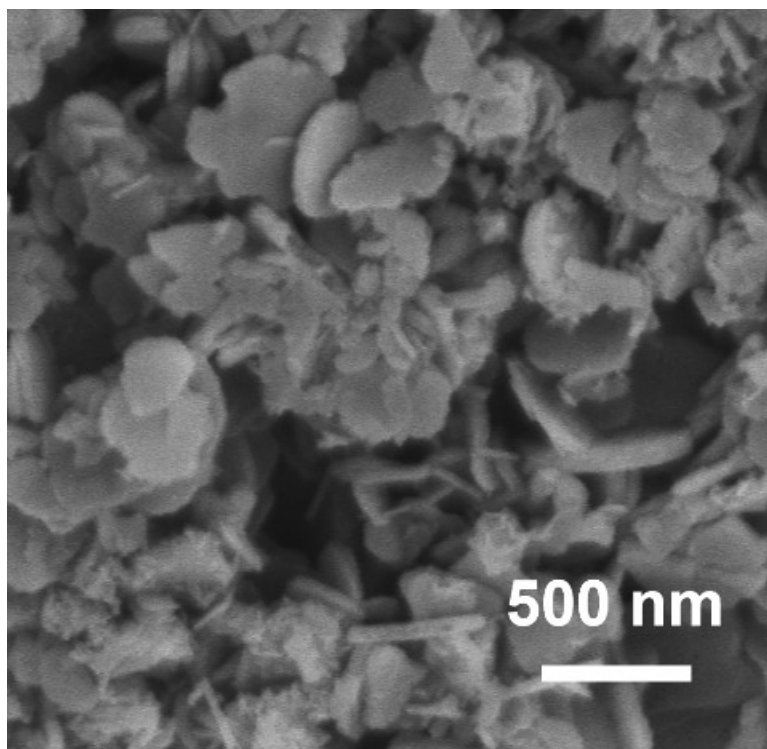

Fig. S6 SEM image of Mn<sub>7.5</sub>Bi<sub>7.5</sub>-S catalyst after stability test.

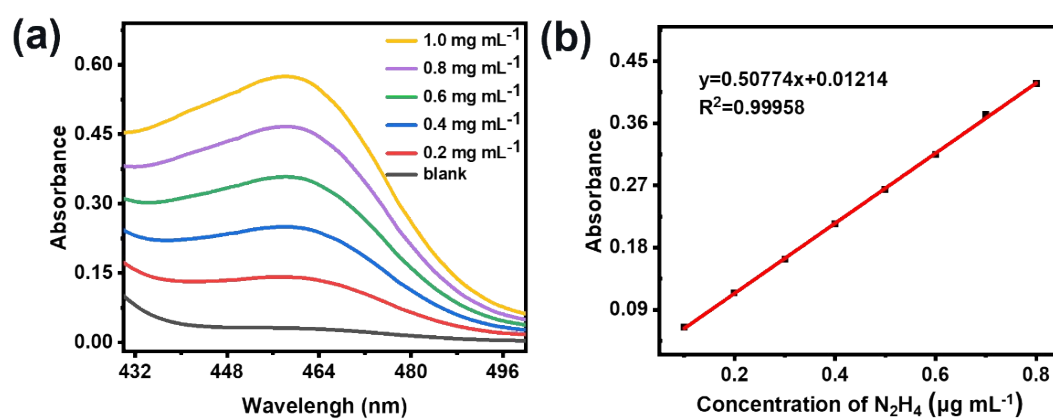

Fig. S7 (a) UV-vis spectra of various  $N_2H_4$  concentrations after incubated for 15 min at room temperature. (b) Calibration curve used for calculation of  $N_2H_4$  concentrations.



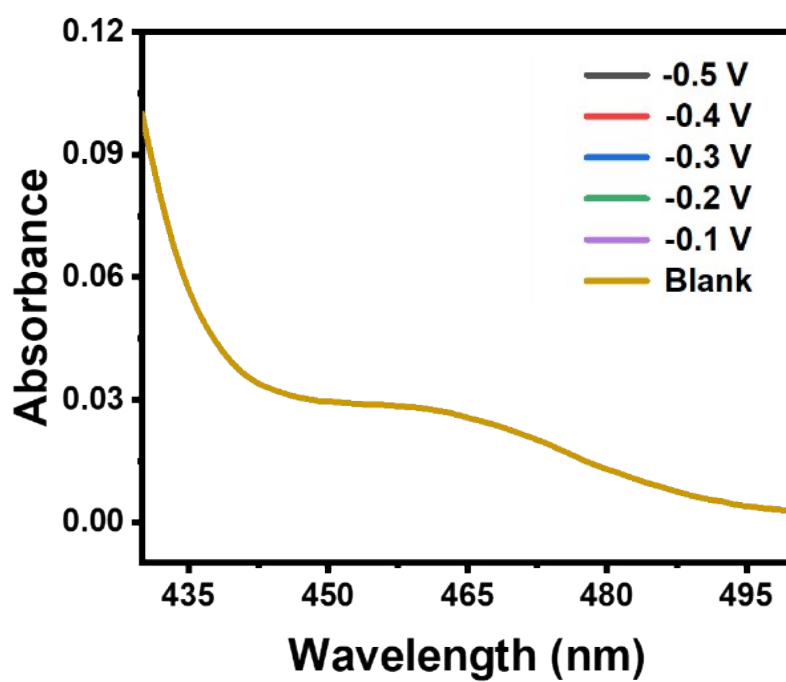

Fig. S8 UV-vis spectra of the electrolytes stained with Watt and Chrisp indicator at various potentials for 2 h.

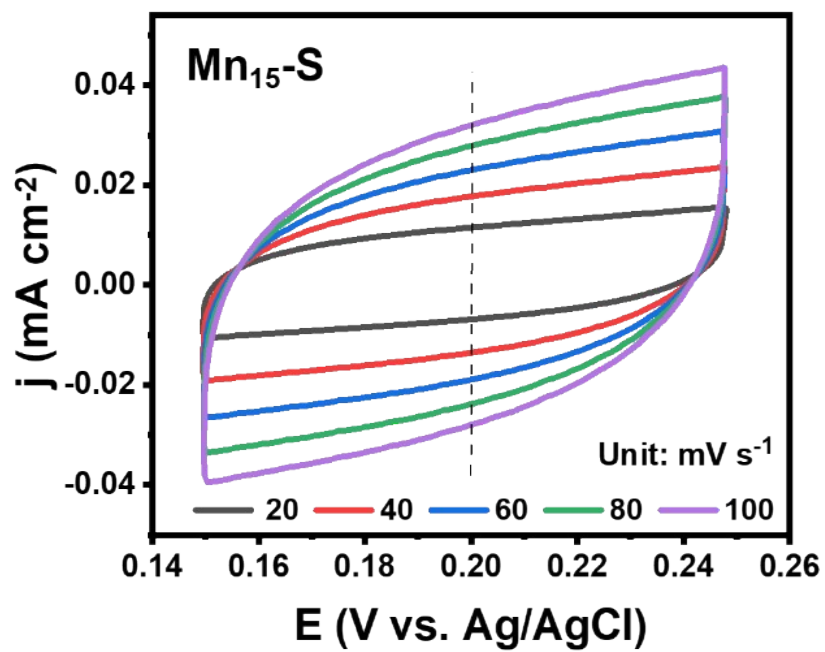

Fig. S9 CV scans measured at a potential range from 0.15 to 0.25 V vs. Ag/AgCl with different scan rates (20, 40, 60, 80 and 100 mV s<sup>-1</sup>) for Mn<sub>15</sub>-S.

**Table S1** Optimal yield rate and Faraday efficiency of  $\text{Mn}_x\text{Bi}_{15-x}\text{-S}$  ( $x = 5, 7.5, 10, 15$  at. %).

| Catalyst                                                    | Yield rate ( $\mu\text{g h}^{-1} \text{mg}^{-1}$ ) | FE (%) |
|-------------------------------------------------------------|----------------------------------------------------|--------|
| <b><math>\text{Mn}_{7.5}\text{Bi}_{7.5}\text{-S}</math></b> | 21.56                                              | 73.36  |
| <b><math>\text{Mn}_{7.5}\text{Bi}_{7.5}</math></b>          | 15.94                                              | 40.06  |
| <b><math>\text{Mn}_{10}\text{Bi}_5\text{-S}</math></b>      | 14.48                                              | 43.91  |
| <b><math>\text{Mn}_5\text{Bi}_{10}\text{-S}</math></b>      | 11.18                                              | 27.87  |
| <b><math>\text{Mn}_{15}\text{-S}</math></b>                 | 16.31                                              | 32.77  |

**Table S2** Comparison for the NRR electrocatalytic activity of Mn<sub>7.5</sub>Bi<sub>7.5</sub>-S catalyst with other reported catalysts.

| <b>Catalyst</b>                                                               | <b>Electrolytes</b>                   | <b>Yield rate</b>                         | <b>FE</b> | <b>Ref.</b> |
|-------------------------------------------------------------------------------|---------------------------------------|-------------------------------------------|-----------|-------------|
| <b>Mn–Bi<sub>2</sub>O<sub>3</sub></b>                                         | 0.1 M Na <sub>2</sub> SO <sub>4</sub> | 23.54 μg h <sup>-1</sup> mg <sup>-1</sup> | 21.63%    | 1           |
| <b>CuMn</b>                                                                   | 0.1 M Na <sub>2</sub> SO <sub>4</sub> | 28.9 μg h <sup>-1</sup> mg <sup>-1</sup>  | 9.83%     | 2           |
| <b>BQD/15MS</b>                                                               | 0.1 M Na <sub>2</sub> SO <sub>4</sub> | 18.5 μg h <sup>-1</sup> mg <sup>-1</sup>  | 33.2%     | 3           |
| <b>Bi<sub>2</sub>S<sub>3-x</sub>/Ti<sub>3</sub>C<sub>2</sub>T<sub>x</sub></b> | 0.1 M Na <sub>2</sub> SO <sub>4</sub> | 68.3 μg h <sup>-1</sup> mg <sup>-1</sup>  | 22.5%     | 4           |
| <b>Bi NS</b>                                                                  | 0.1 M Na <sub>2</sub> SO <sub>4</sub> | 13.23 μg h <sup>-1</sup> mg <sup>-1</sup> | 10.46%    | 5           |
| <b>Bi@C</b>                                                                   | 0.1 M Na <sub>2</sub> SO <sub>4</sub> | 4.22 μg h <sup>-1</sup> mg <sup>-1</sup>  | 15.10%    | 6           |
| <b>S-Bi NB</b>                                                                | 0.1 M Na <sub>2</sub> SO <sub>4</sub> | 10.28 μg h <sup>-1</sup> mg <sup>-1</sup> | 10.48%    | 7           |
| <b>Au/PCN</b>                                                                 | 0.05 M H <sub>2</sub> SO <sub>4</sub> | 13.8 μg h <sup>-1</sup> cm <sup>-2</sup>  | 61.8%     | 8           |
| <b>AuNPs</b>                                                                  | 0.1 M Li <sub>2</sub> SO <sub>4</sub> | 9.22 μg h <sup>-1</sup> cm <sup>-2</sup>  | 73.32%    | 9           |
| <b>Bi-NPs</b>                                                                 | 0.1 M Na <sub>2</sub> SO <sub>4</sub> | 16.25 μg h <sup>-1</sup> mg <sup>-1</sup> | 12.11 %   | 10          |
| <b>Mn<sub>7.5</sub>Bi<sub>7.5</sub>-S</b>                                     | 0.1 M Na <sub>2</sub> SO <sub>4</sub> | 21.56 μg h <sup>-1</sup> mg <sup>-1</sup> | 73.36%    | This work   |

## Notes and references

1. H. Ying, J. H. Bi, H. Xu, G. B. Wu, X. N. Wu, J. C. Hao and Z. H. Li, *ACS Sustain. Chem. Eng.*, 2022, **10**, 6766-6774.
2. Y. H. Cui, A. Q. Dong, Y. B. Qu, J. Y. Zhang, M. Zhao, Z. L. Wang and Q. Jiang, *Chem. Eng. J.*, 2021, **426**, 6.
3. N. Gao, H. M. Yang, D. Dong, D. Y. Dou, Y. J. Liu, W. J. Zhou, F. F. Gao, C. Nan, Z. H. Liang and D. H. Yang, *J. Colloid Interface Sci.*, 2022, **611**, 294-305.
4. Y. J. Luo, P. Shen, X. C. Li, Y. L. Guo and K. Chu, *Nano Res.*, 2022, **15**, 3991-3999.
5. L. Q. Li, C. Tang, B. Q. Xia, H. Y. Jin, Y. Zheng and S. Z. Qiao, *ACS Catalysis*, 2019, **9**, 2902-2908.
6. Y. C. Wan, H. J. Zhou, M. Y. Zheng, Z. H. Huang, F. Y. Kang, J. Li and R. T. Lv, *Adv. Funct. Mater.*, 2021, **31**, 10.
7. Y. X. Lin, L. Yang, H. L. Jiang, Y. K. Zhang, Y. N. Bo, P. Liu, S. M. Chen, B. Xiang, G. Li, J. Jiang, Y. J. Xiong and L. Song, *J. Phys. Chem. Lett.*, 2020, **11**, 1746.
8. K. Peramaiah, V. Ramalingam, H. C. Fu, M. M. Alsabban, R. Ahmad, L. Cavallo, V. C. Tung, K. W. Huang and J. H. He, *Adv. Mater.*, 2021, **33**, 12.
9. Y. Zhou, X. P. Yu, X. Y. Wang, C. Chen, S. T. Wang and J. Zhang, *Electrochim. Acta*, 2019, **317**, 34-41.
10. D. Z. Yao, C. Tang, L. Q. Li, B. Q. Xia, A. Vasileff, H. Y. Jin, Y. Z. Zhang and S. Z. Qiao, *Adv. Energy Mater.*, 2020, **10**, 8.
